# Supplementary material for: Resectable lung lesions malignancy assessment and cancer detection by ultra-deep sequencing of targeted gene mutations in plasma cell-free DNA
Source: PubMed Central journal article supplement — J Med Genet. 2019 Apr 13;56(10):647–53. doi: 10.1136/jmedgenet-2018-105825 (PMC6817693; doi:10.1136/jmedgenet-2018-105825), 2019-04-13

Figure S1. Frequency of All ctDNA Mutations in Lung Cancer Patients

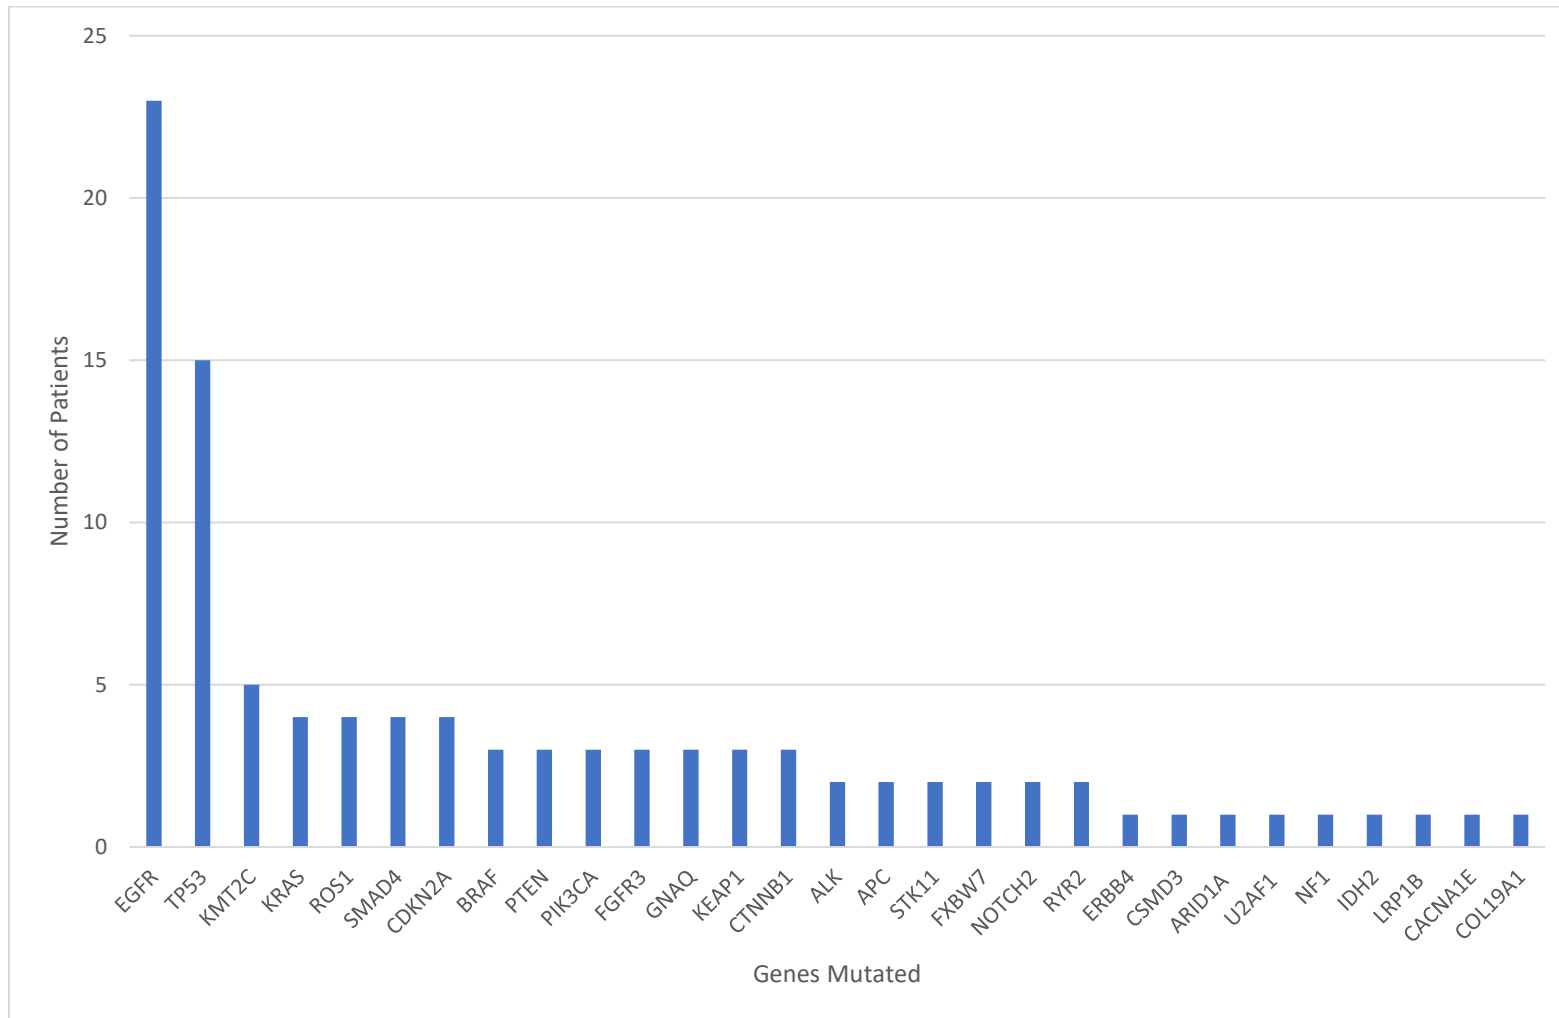

Figure S2. Mutation Concordance between Plasma ctDNA and FFPE Tissue

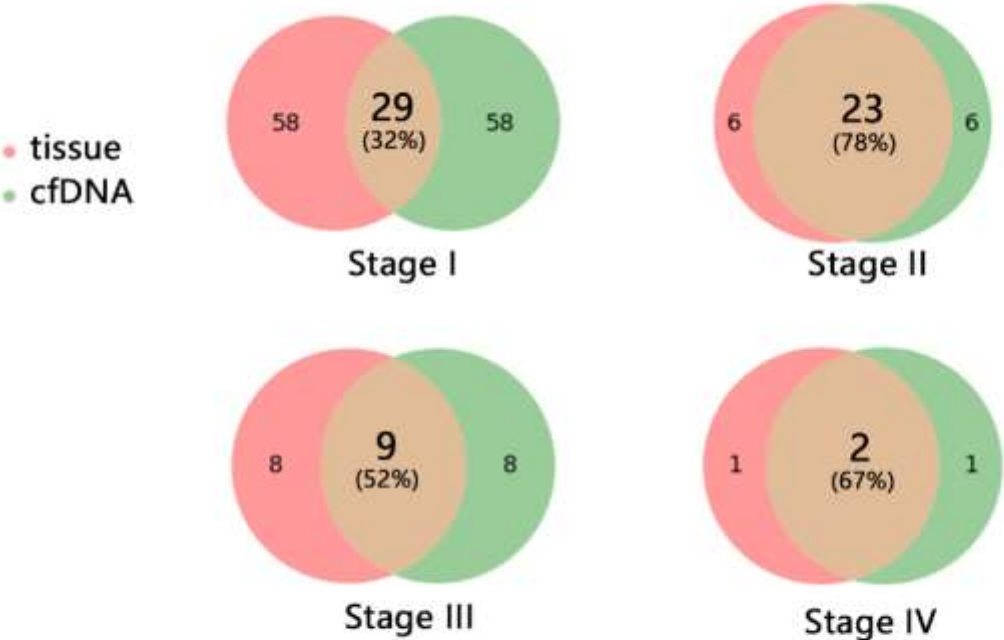

Figure S3. LDA Model Performance

A. Model

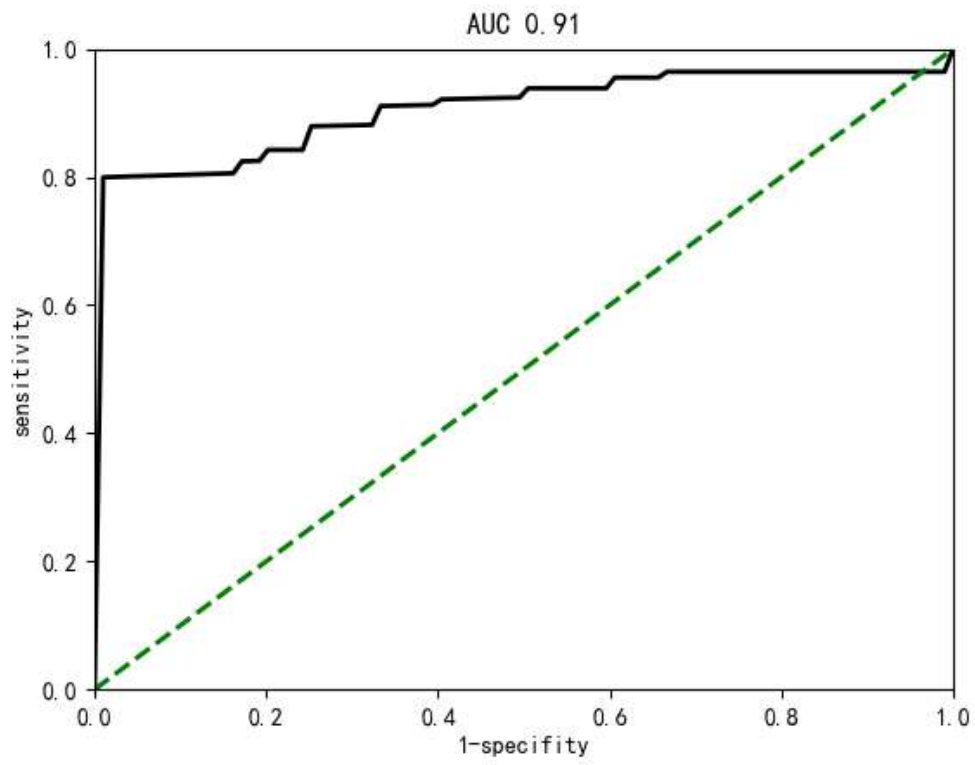

B. Sigmoid Fit

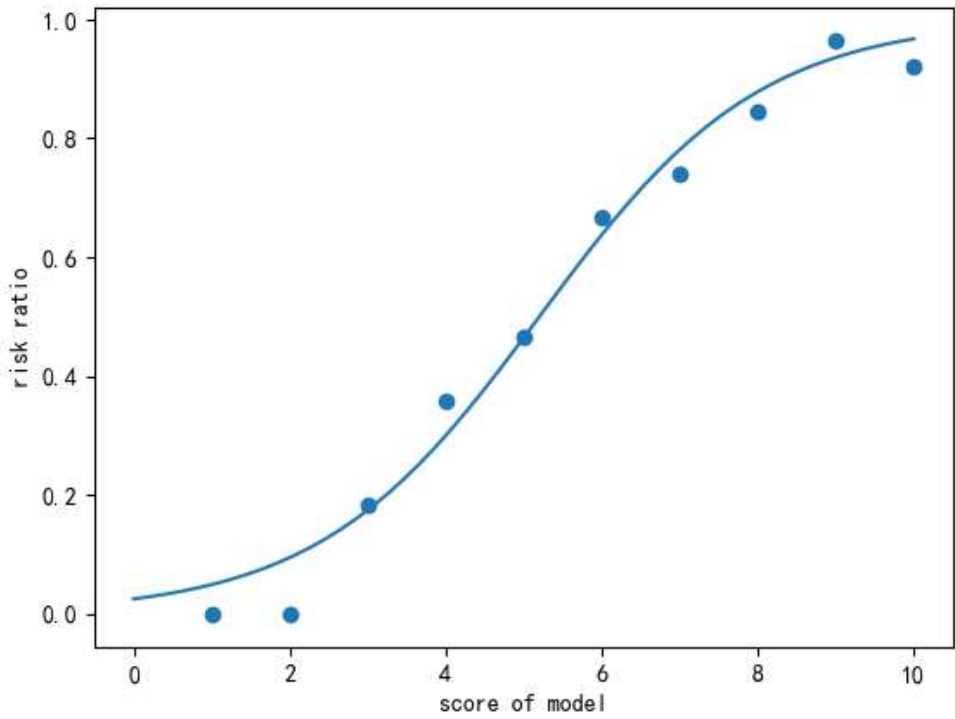

Supplement: jmedgenet-2018-105825supp003.pdf [file jmedgenet-2018-105825supp003.pdf]
